# Supplementary material for: Elemental iron: reduction of pertechnetate in the presence of silica and periodicity of precipitated nano-structures
Source: Royal Society of Chemistry journal article supplement (doi:10.1039/d0en00897d), 2020-11-10
Supplement: d0en00897d1.pdf [file d0en00897d1.pdf]

## Supplementary Information for

### **Elemental Iron: Reduction of Pertechnetate in the Presence of Silica and Periodicity of Precipitated Nano-structures**

Daria Boglaienko<sup>†</sup>, Odeta Qafoku<sup>†</sup>, Ravi K. Kukkadapu<sup>†</sup>, Libor Kovarik<sup>†</sup>, Yelena Katsenovich<sup>§</sup>, Denis E. Cherkasov<sup>†</sup>, Hilary P. Emerson<sup>†</sup>, and Tatiana G. Levitskaia<sup>†\*</sup>

<sup>†</sup>Pacific Northwest National Laboratory

<sup>§</sup>Florida International University

\* Corresponding author: [Tatiana.Levitskaia@pnl.gov](mailto:Tatiana.Levitskaia@pnl.gov)

**10 Pages; 6 Figures; 1 Table**

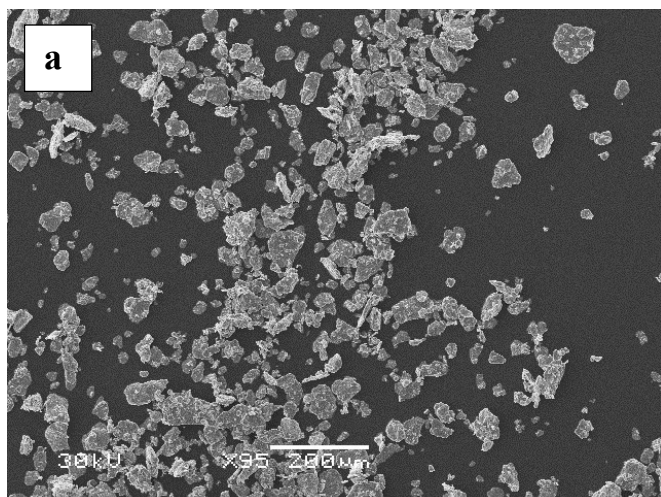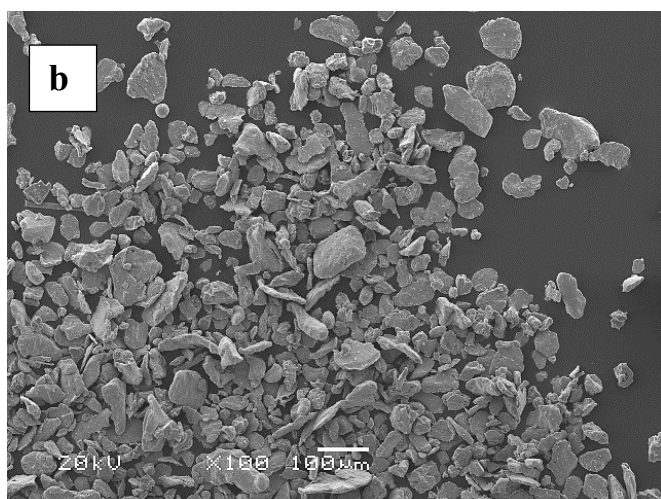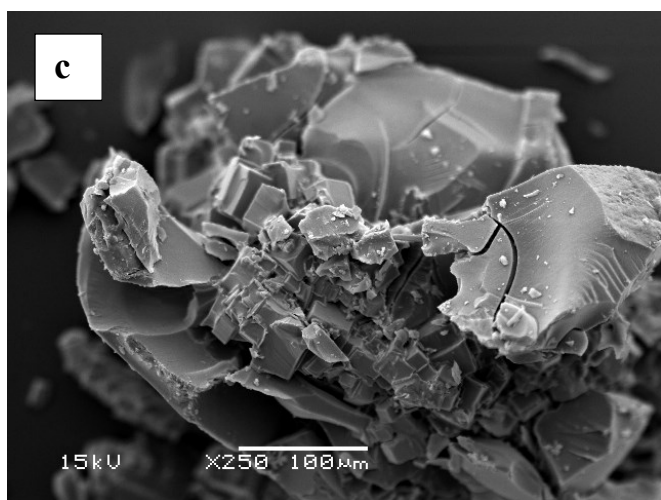

**Figure S1.** SEM images of (a) ZVI-A (Alfa Aesar, 99+% purity, 75  $\mu\text{m}$ ) as received; (b) ZVI-B (Hepure Technologies Inc., 95+% of purity, 297  $\mu\text{m}$ ) as received; and (c) synthesized amorphous silica.

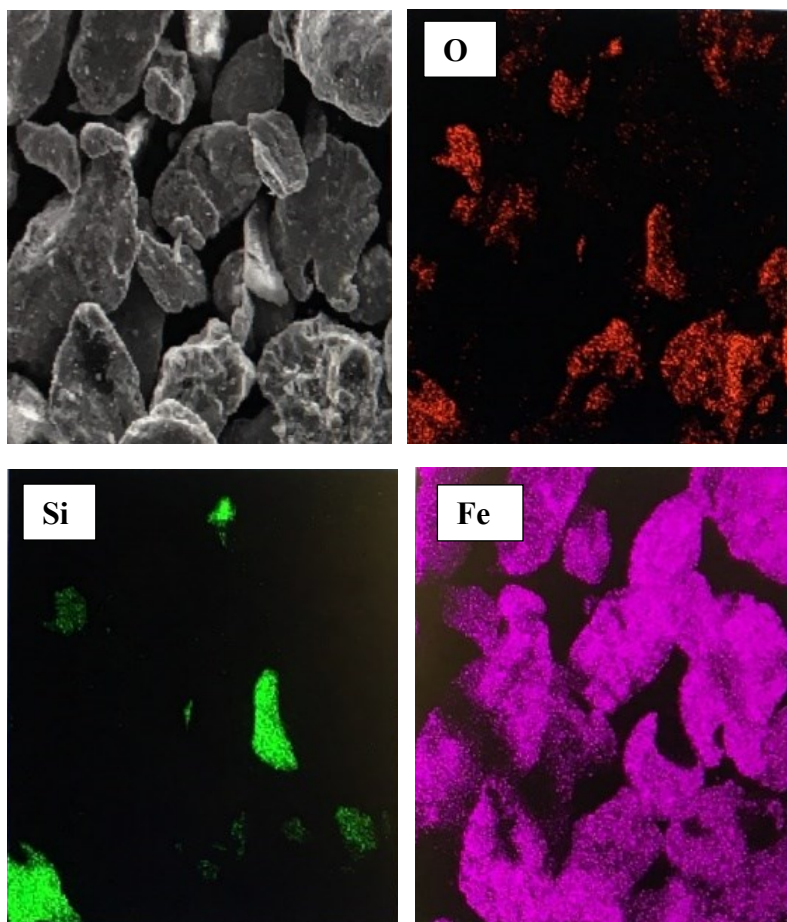

**Figure S2.** EDX maps for ZVI-B (Hepure Technologies Inc.) as received.

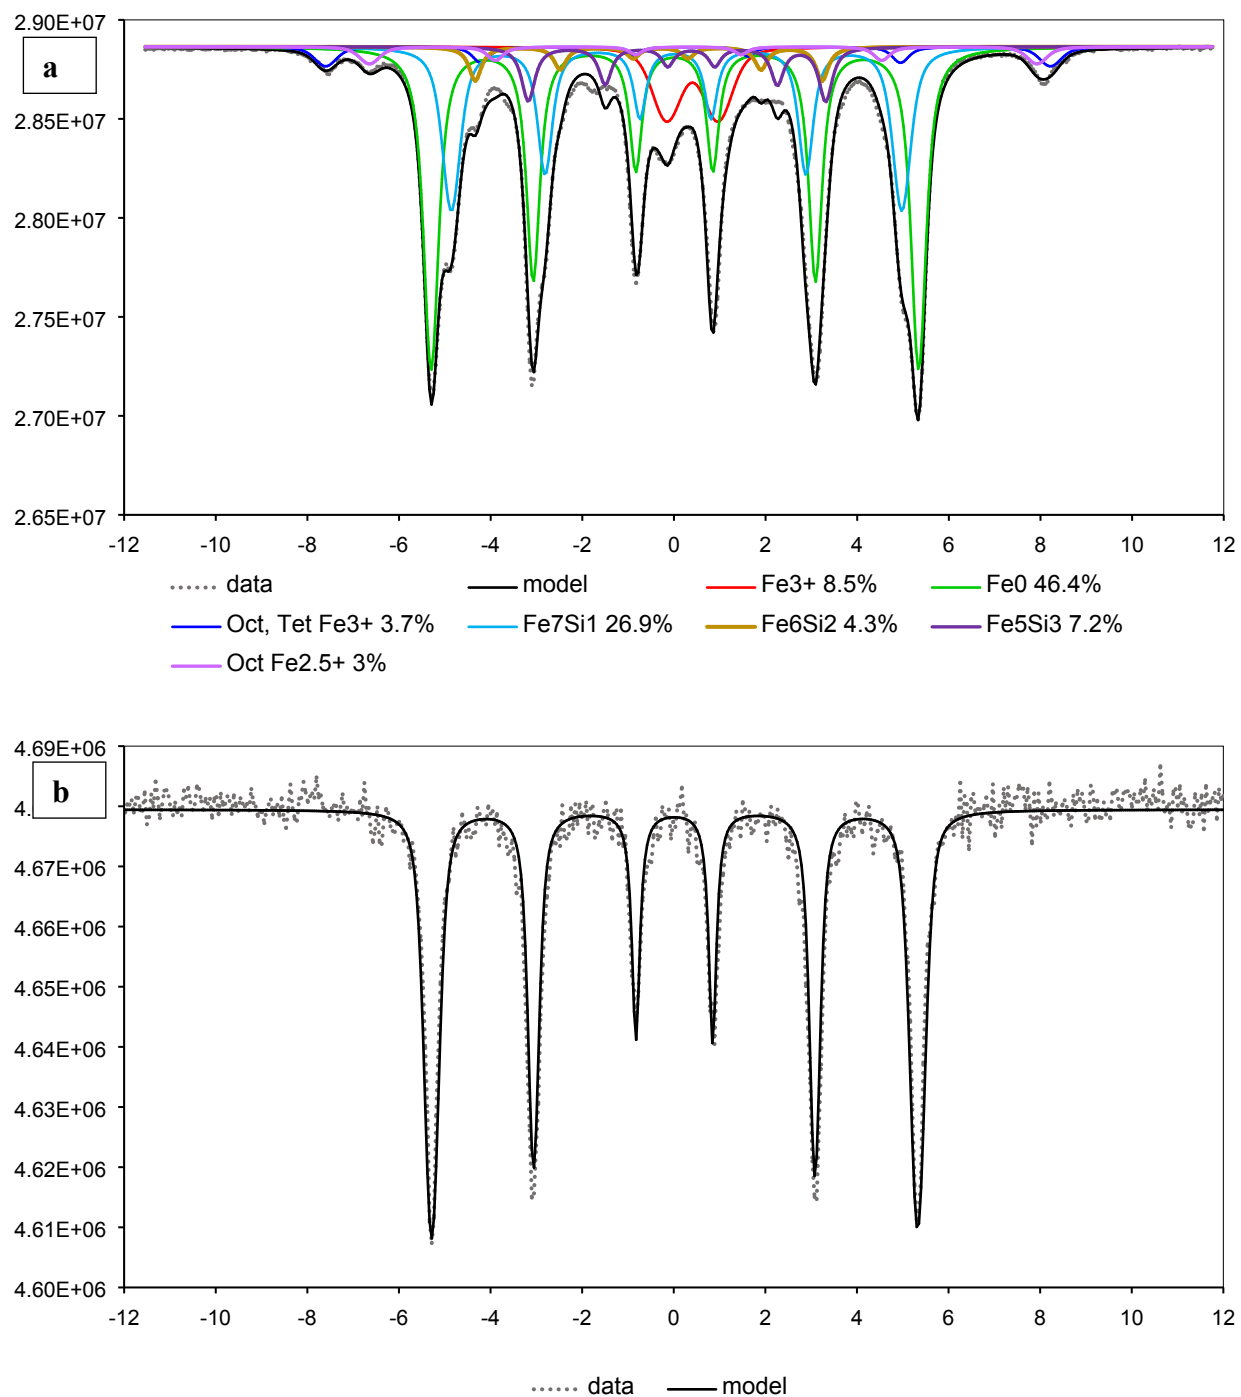

**Figure S3.** RT Mossbauer spectra for ZVI-B (Hepure Technologies Inc.) as received (a) and ZVI-A as received (b). Fe7Si1, Fe6Si2, and Fe5Si3 in (a) corresponds to number of Fe and Si atoms in bcc Fe (Fe-Si alloy with different number of Si in bcc environment); model in (b) corresponds to pure bcc Fe.

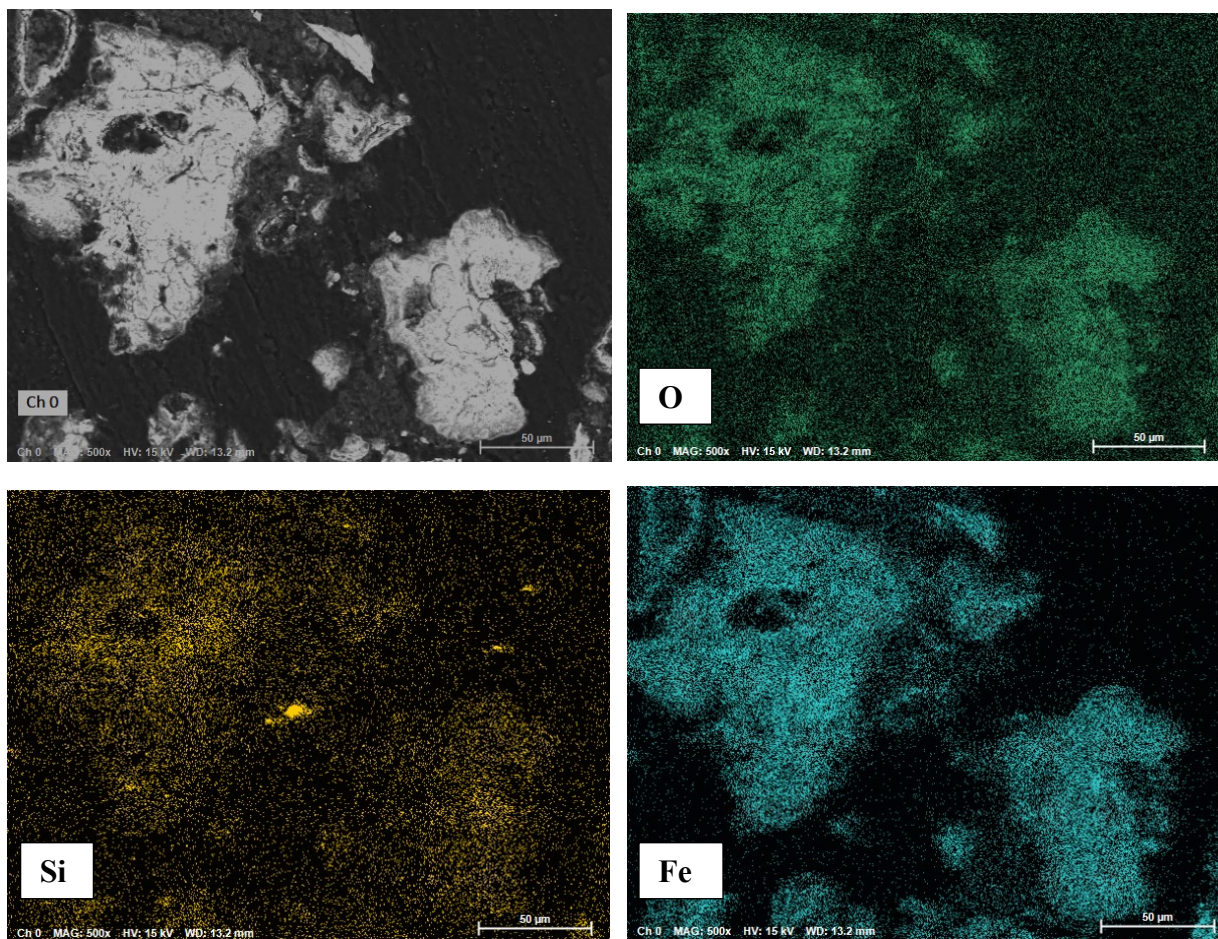

**Figure S4.** EDX maps for ZVI-B (Hepure Technologies Inc.) after contact with 0.03 mM  $\text{TcO}_4^-$  in 0.80 M NaCl solution.

(a)

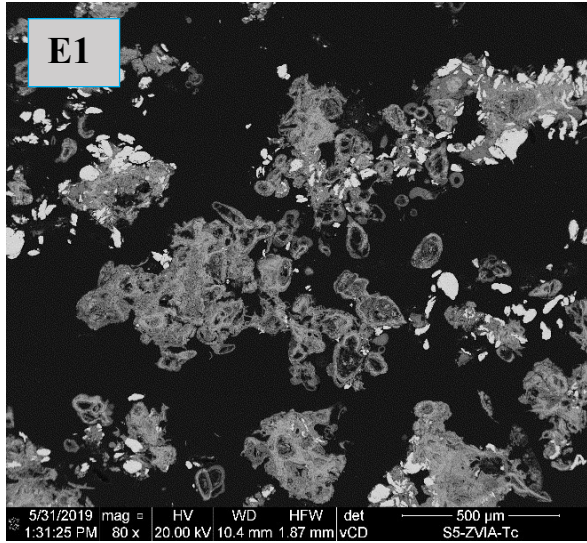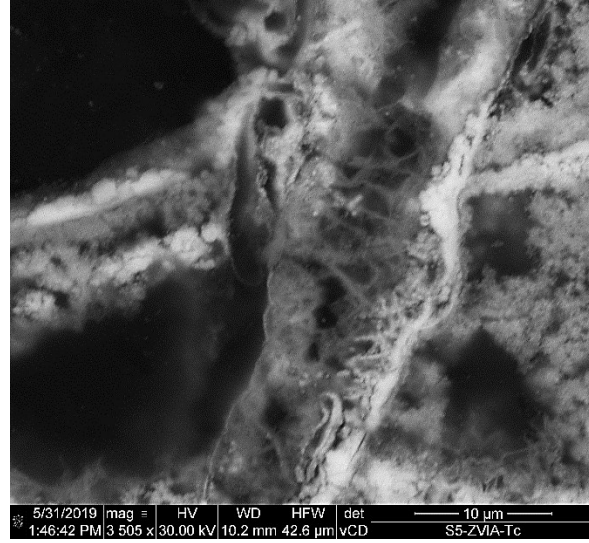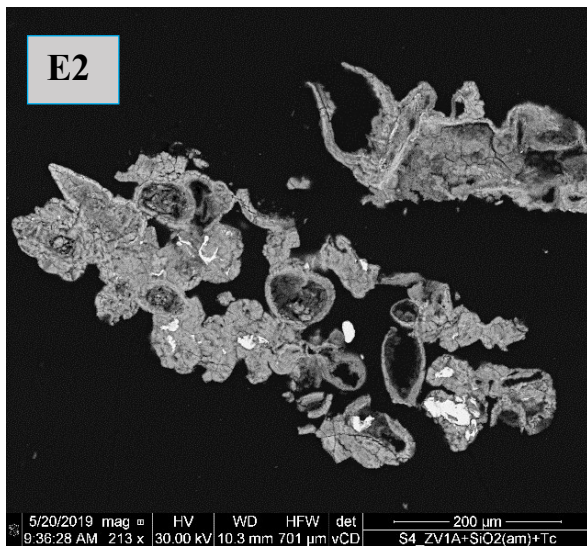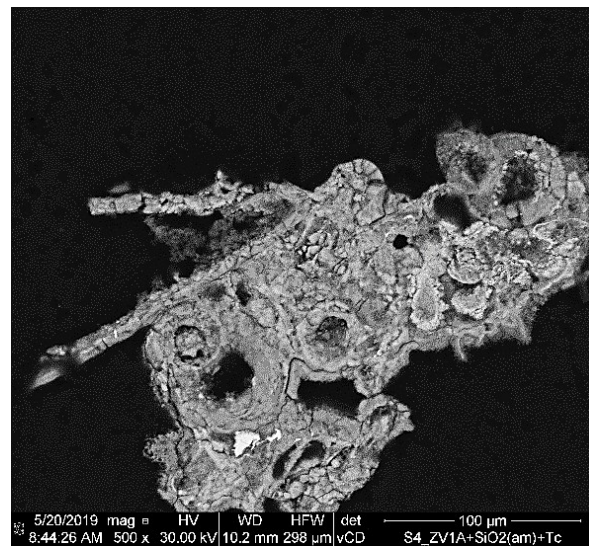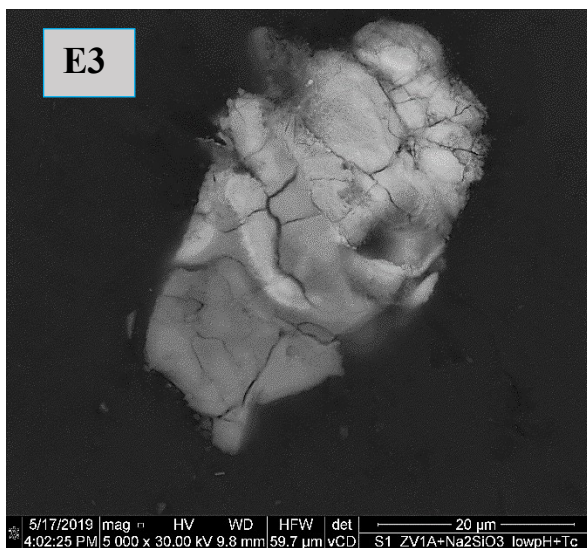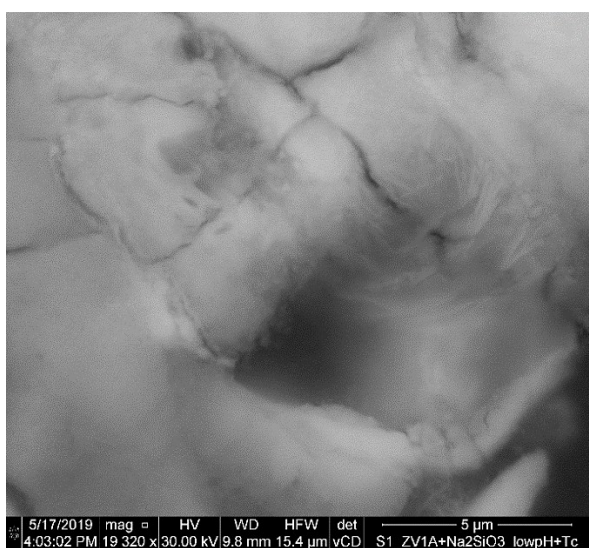

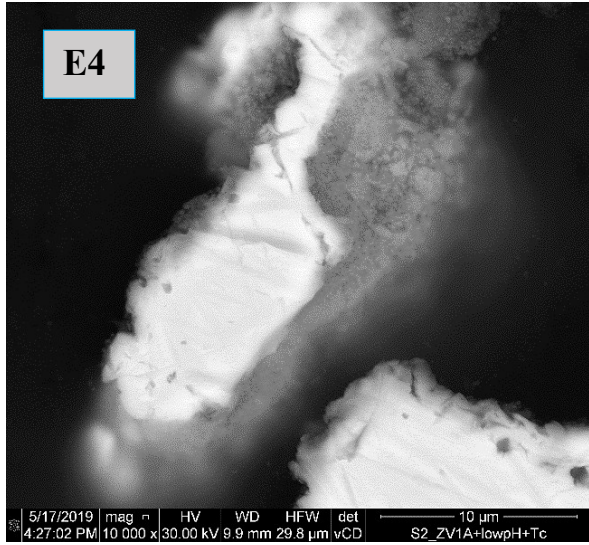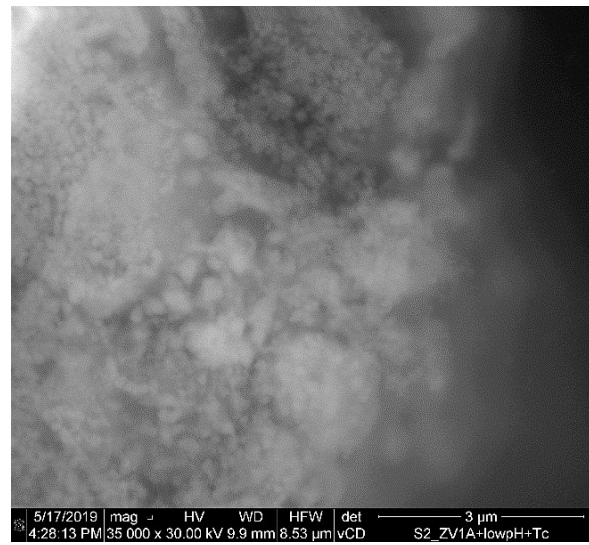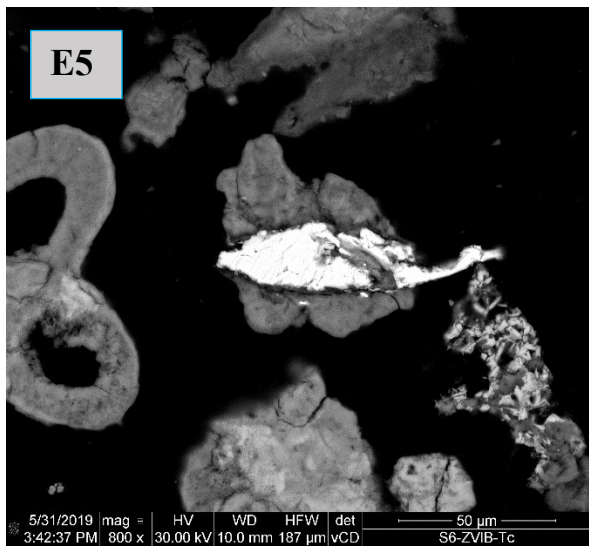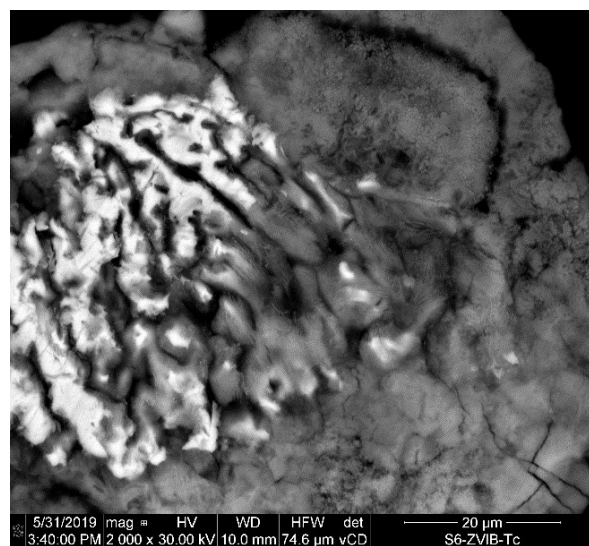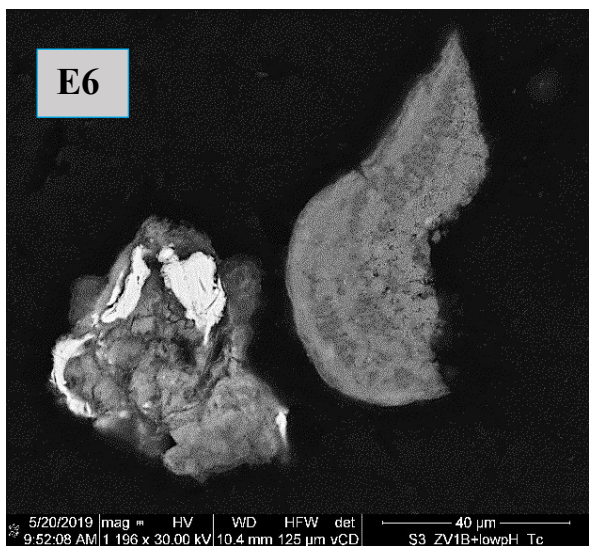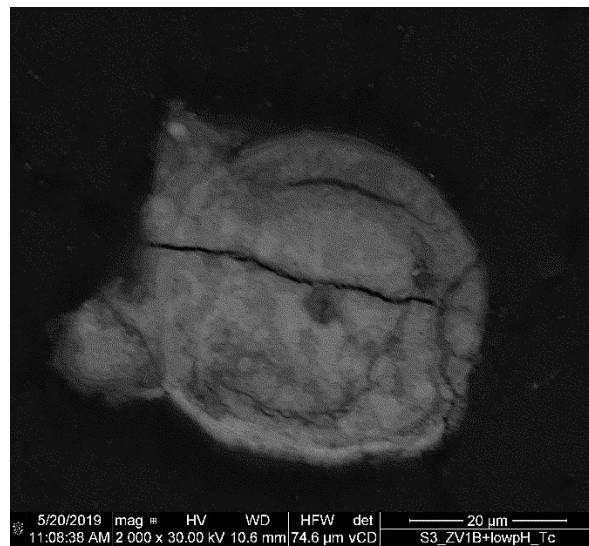

**(b)**

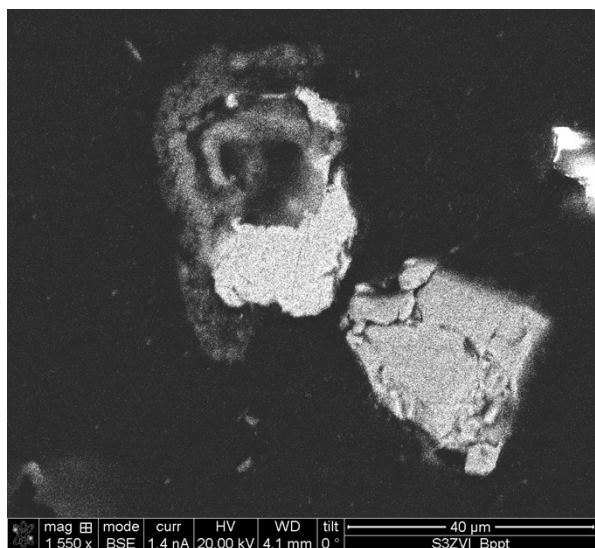

**Figure S5.** (a) SEM images for the experimental series (E1-E6) after contact with 0.03 mM  $\text{TcO}_4^-$  in 0.08 mM NaCl solution. (b) SEM image of ZVI-B (E6) before exposure to 0.03 mM  $\text{TcO}_4^-$  in 0.08 mM NaCl solution.



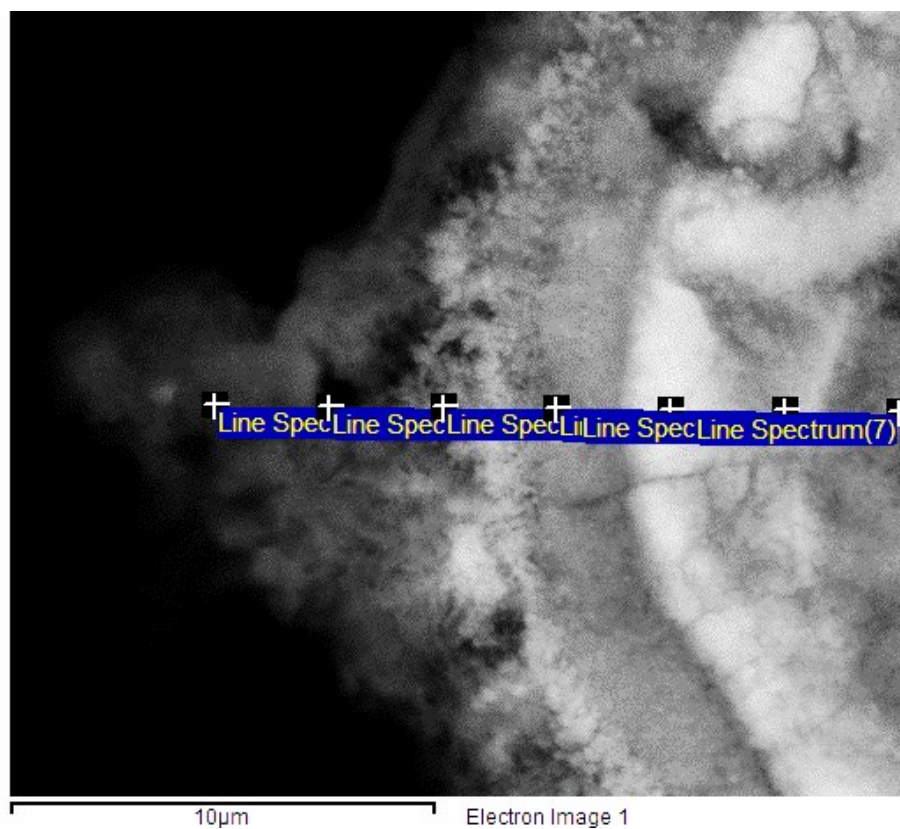

**Figure S6.** Locations of EDX analysis, series E1 (Table S2).

**Table S1.** EDX of the layered iron mineral structure in the series E1 (average atomic percent of elements); carbon tape was not excluded from the estimate.

| Locations | C     | O     | Si   | Fe    | Total |
|-----------|-------|-------|------|-------|-------|
| 1         | 44.97 | 21.79 | 0.24 | 33.00 | 100   |
| 2         | 34.09 | 5.77  |      | 60.14 | 100   |
| 3         | 28.15 | 27.48 |      | 44.37 | 100   |
| 4         | 20.34 | 22.94 |      | 56.71 | 100   |
| 5         | 14.50 | 33.37 |      | 52.14 | 100   |
| 6         | 17.48 | 26.40 |      | 56.12 | 100   |
| 7         | 24.87 | 26.33 |      | 48.80 | 100   |
